# Supplementary material for: Clinical and Microbiological Effects of an Antimicrobial Stewardship Program in Urology—A Single Center Before-After Study
Source: MDPI journal article supplement (doi:10.3390/antibiotics11030372), 2022-03-10
Supplement: s1 [file s1]

**Table S1.** Antibiotic consumption in recommended daily doses/ 1000 patient-days.

| Antibiotic              | Pre-AMS |         |         |         | AMS     |         |         |         | Difference<br>(Absolute Values) | Difference<br>(%) |
|-------------------------|---------|---------|---------|---------|---------|---------|---------|---------|---------------------------------|-------------------|
|                         | Q4 2018 | Q1 2019 | Q2 2019 | Q3 2019 | Q1 2020 | Q2 2020 | Q3 2020 | Q4 2020 |                                 |                   |
| Amoxicillin             | 0       | 0,0     | 0,0     | 14,40   | 6,78    | 7,31    | 0,00    | 17,35   | 17,04                           | 118,33            |
| Ampicillin/Sulbactam    | 26,47   | 29,49   | 29,51   | 50,03   | 49,26   | 37,53   | 40,80   | 48,62   | 40,71                           | 30,04             |
| Sultamicillin           | 178,57  | 150,79  | 185,49  | 188,30  | 175,75  | 174,89  | 115,59  | 143,30  | -93,62                          | -13,31            |
| Flucloxacillin          | 0,74    | 0,00    | 1,83    | 0,00    | 5,09    | 7,58    | 0,00    | 0,00    | 10,1                            | 393,00            |
| Piperacillin/Tazobactam | 51,76   | 59,02   | 55,37   | 42,39   | 56,04   | 64,12   | 75,57   | 62,53   | 49,72                           | 23,84             |
| Cefuroxime              | 38,15   | 42,13   | 21,43   | 24,27   | 6,78    | 9,18    | 35,36   | 27,62   | -47,04                          | -37,34            |
| Cefpodoxime             | 46,77   | 67,02   | 76,14   | 111,96  | 94,24   | 96,15   | 117,86  | 112,04  | 118,4                           | 39,22             |
| Ceftriaxone             | 96,37   | 62,23   | 38,76   | 55,98   | 81,51   | 38,46   | 36,26   | 41,69   | -55,42                          | -21,88            |
| Meropenem               | 42,52   | 42,27   | 30,45   | 49,21   | 30,57   | 24,73   | 27,92   | 44,29   | -36,94                          | -22,46            |
| Ciprofloxacin           | 62,36   | 52,66   | 24,92   | 30,53   | 3,82    | 2,75    | 11,33   | 18,24   | -134,33                         | -78,80            |
| Levofloxacin            | 192,74  | 134,04  | 66,45   | 50,89   | 61,13   | 32,97   | 11,33   | 28,66   | -310,03                         | -69,81            |
| Cotrimoxazol            | 22,68   | 33,51   | 27,69   | 40,71   | 28,68   | 17,86   | 31,73   | 54,09   | 7,77                            | 6,24              |
| Metronidazol            | 0,00    | 6,37    | 7,36    | 8,50    | 8,51    | 12,80   | 9,07    | 10,42   | 18,57                           | 83,54             |
| Tobramycin              | 9,47    | 9,57    | 0,94    | 11,35   | 18,70   | 0,00    | 0,00    | 0,00    | -12,63                          | -40,31            |
| Vancomycin              | 22,68   | 15,56   | 19,38   | 20,36   | 6,37    | 8,24    | 4,53    | 15,63   | -43,21                          | -55,41            |
| Linezolid               | 5,67    | 3,83    | 5,54    | 2,54    | 5,09    | 0,00    | 11,33   | 8,08    | 6,92                            | 39,36             |
| Clindamycin             | 1,87    | 0,00    | 14,01   | 0,00    | 6,78    | 0,00    | 6,35    | 6,25    | 3,5                             | 22,04             |
| Fluconazole             | 24,09   | 7,18    | 11,07   | 13,99   | 0,00    | 10,99   | 0,00    | 2,61    | -42,73                          | -75,86            |
| Total                   | 822,90  | 715,65  | 646,79  | 723,92  | 645,08  | 545,55  | 535,04  | 640,39  | -543,2                          | -18,67            |

AMS: Antimicrobial stewardship; Q: quarter.

**Table S2.** Recommendations for perioperative prophylaxis.

| Procedure                                                       | Antibiotic                                                                                     | Application                          | Duration of Antibiotic Prophylaxis *                                          |
|-----------------------------------------------------------------|------------------------------------------------------------------------------------------------|--------------------------------------|-------------------------------------------------------------------------------|
| Transurethral resection (bladder/ prostate) or ureterorenoscopy | According to the pre-OP urine culture<br>If the culture is sterile:<br>Ampicillin/Sulbactam ** | i.v./p.o.                            | Relevant bacteraemia: starting 2 days before OP<br>Sterile urine: single shot |
| Percutaneous nephrolithotomy and litholapaxy                    | According to the pre-OP urine culture<br>If the culture is sterile:<br>Ampicillin/Sulbactam ** | i.v./p.o.                            | Relevant bacteraemia: starting 2 days before OP<br>Sterile urine: single shot |
| Prostate biopsy                                                 | Fosfomycine *                                                                                  | 1 x 3 g p.o.<br>(1-4 h pre-OP)       | Single shot                                                                   |
| Robotic-assisted partial nephrectomy                            | Ampicillin/Sulbactam **                                                                        | 1 x 3g i.v.                          | Single shot                                                                   |
| Cystectomy with ileal conduit                                   | Ampicillin/Sulbactam **<br>Cefpodoxime *                                                       | 3 x 3 g i.v. /d<br>2 x 200 mg p.o./d | 3d i.v.,<br>after d4<br>total duration: 14d                                   |
| Robotic-assisted radical prostatectomy                          | Ampicillin/Sulbactam **                                                                        | 1 x 3g i.v. /d                       | Single shot                                                                   |
| Open nephrectomy                                                | Ampicillin/Sulbactam **                                                                        | 1 x 3g i.v. /d                       | Single shot                                                                   |
| Laparoscopic (partial) nephrectomy                              | Ampicillin/Sulbactam **                                                                        | 1 x 3g i.v. /d                       | Single shot                                                                   |
| Retropubic radical prostatectomy                                | Ampicillin/Sulbactam **                                                                        | 3 x 3g i.v. /d                       | Single shot                                                                   |

\* The preoperative dosing should be administered within 60 minutes to surgical incision; additional intraoperative dosing should be considered for surgeries lasting longer than 3 hours or in case of excessive blood loss during the procedure (> 1 liter). \*\* Adjust the dosing according to the kidney function.
